# Supplementary material
Source: PubMed Central journal article supplement (PMC3034219)
Supplement: NIHMS262782-supplement-Appendix.pdf [file NIHMS262782-supplement-Appendix.pdf]

## Supplementary Figure 1

### ETBF activate Stat3 in B6 and Min mice colons

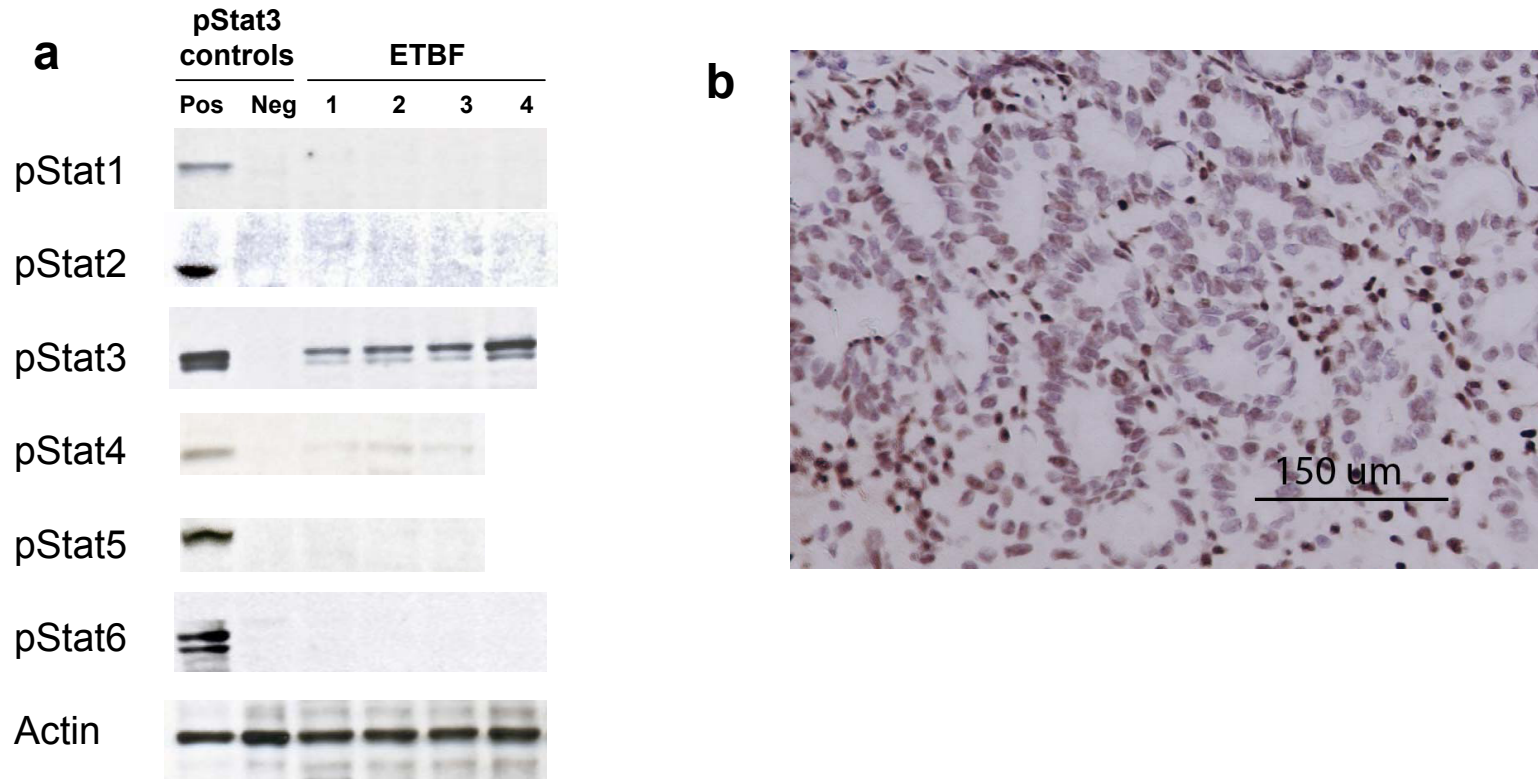

**Figure Legend:** (a) ETBF induce predominantly pStat3 in colons of C57Bl/6 mice. pStat nuclear proteins were evaluated by western blot on nuclear extracts of colons of 3-4 ETBF-colonized C57Bl/6 mice. Positive and negative controls for each pStat protein are included for comparison. Equal amounts of nuclear protein were loaded in each lane. Actin further serves as a loading control. (b) pStat3 staining in infiltrating leukocytes of the colonic mucosa of an ETBF-colonized Min mouse. An example of ETBF-colonized mucosa in which marked inflammatory infiltrates demonstrated pStat3 staining by IHC.

## Supplementary Figure 2

**Splenic cells display intracellular IFN- $\gamma$  but minimal IL-17 in ETBF-colonized Min mice.**

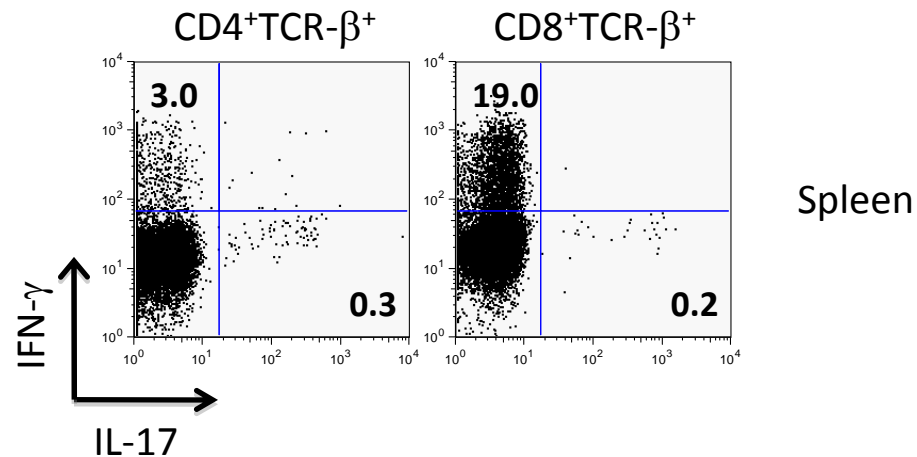

**Figure Legend:** Splenic cells isolated from Min mice colonized with ETBF for 1 wk and activated with PMA, ionomycin and Golgiplug<sup>TM</sup> for 5 hr were first stained for surface markers followed by intracellular staining for IFN- $\gamma$  and IL-17.

### Supplementary Figure 3

## CD3<sup>-</sup> and CD3<sup>+</sup>CD8<sup>+</sup> leukocytes are not responsible for IL-17 production in ETBF-colonized Min mice.

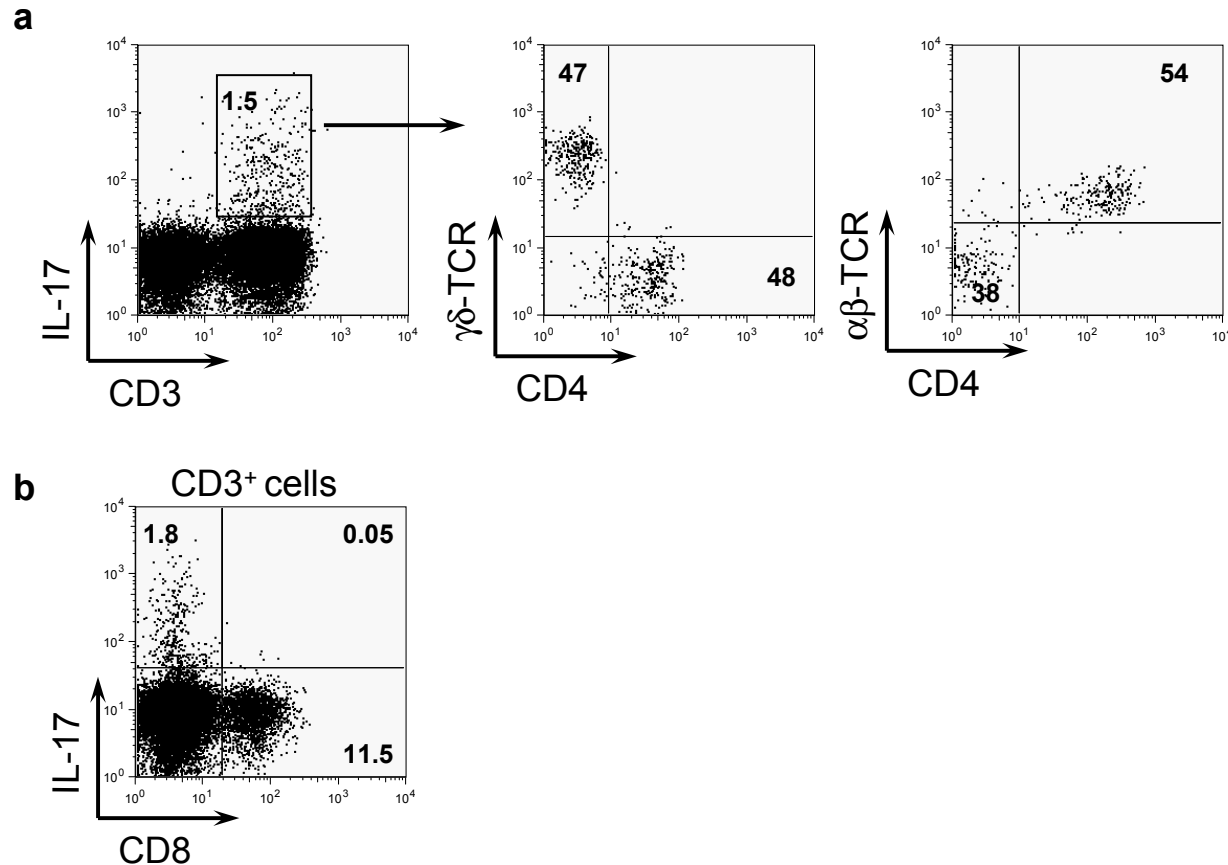

**Figure Legend:** Isolated colonic lymphocytes from Min mice colonized with ETBF for 1 wk and activated 5 hrs *in vitro* with PMA and ionomycin in the presence of Golgiplug<sup>TM</sup>. **(a)** CD3<sup>-</sup> leukocytes do not display ICS for IL-17. Two right dot plots show the expression of  $\gamma\delta$ -TCR,  $\alpha\beta$ -TCR and CD4<sup>+</sup> on the CD3<sup>+</sup>IL-17<sup>+</sup> lymphocytes. **(b)** CD3<sup>+</sup>CD8<sup>+</sup> lymphocytes do not display ICS for IL-17. The dot plot is derived from CD3<sup>+</sup> cells. The figure is representative of at least 3 independent experiments.

## Supplementary Figure 4

### Mucosal cytokine expression in NTBF- and ETBF-colonized Min mice.

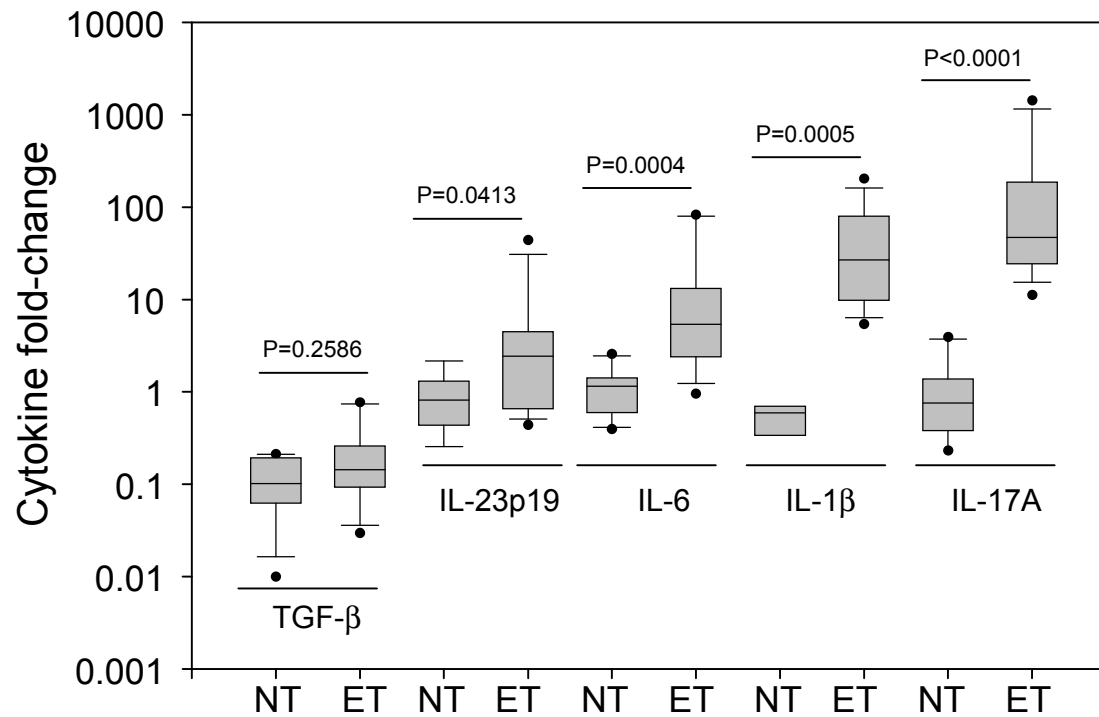

**Figure Legend:** qPCR analysis of Th17 pathway cytokines in the colonic mucosa of Min mice colonized with NTBF or ETBF for 1 wk. The distribution of the cytokine data are shown as box and whisker plots. NT = NTBF-colonized and ET = ETBF-colonized mice.  $n = 10-15$  per condition except NT, IL-1 $\beta$  ( $n = 4$ ).

## Supplementary Figure 5

### Distribution of colon tumor sizes in ETBF-colonized Min mice treated with Th17 pathway neutralizing antibodies.

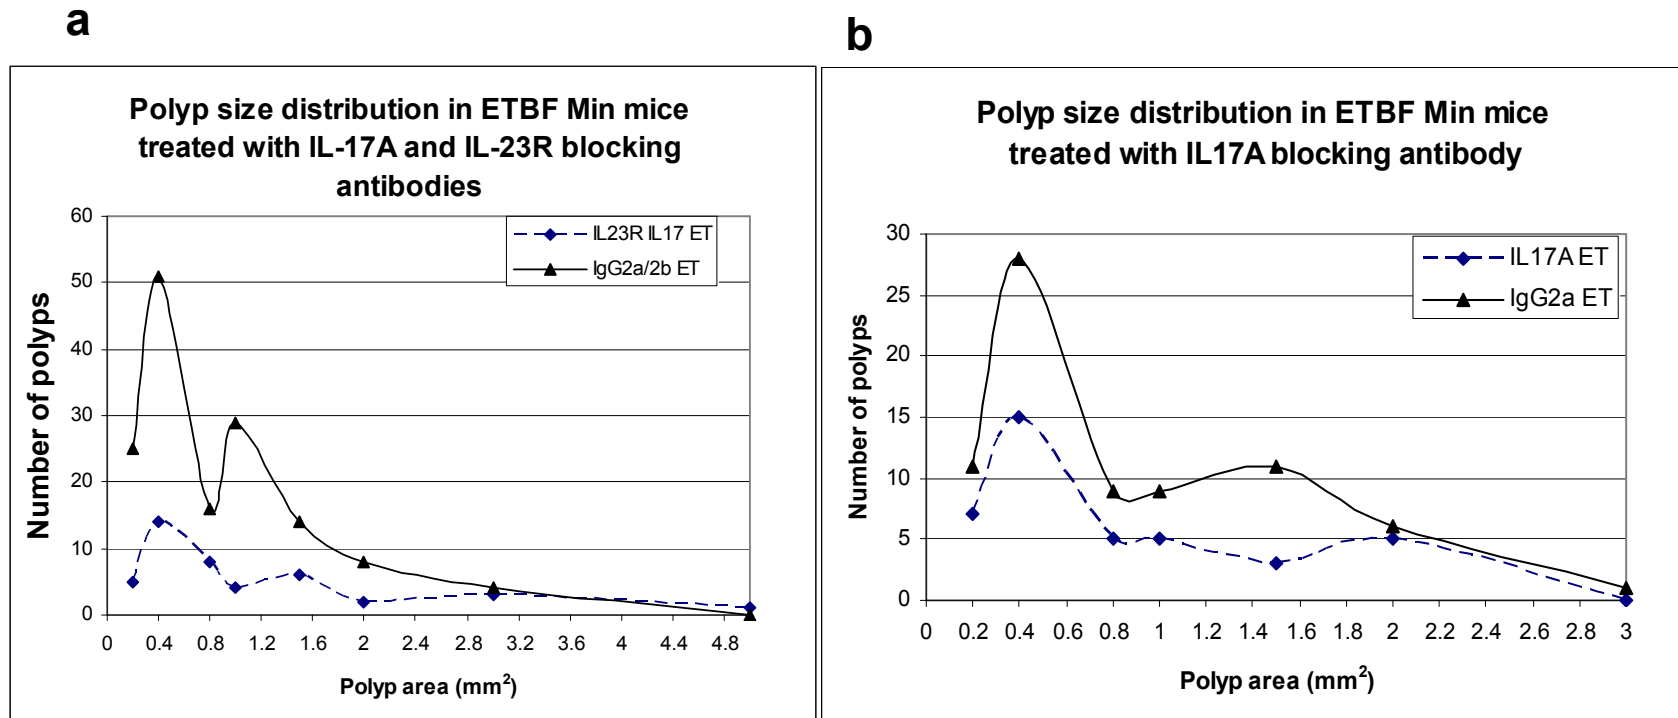

**Figure Legend:** Methylene blue-stained colon tumors were counted at 5 wks after bacterial inoculation and sized by microscopy. In panel (a), ETBF-colonized Min mice were treated with IL-17A and IL-23R neutralizing antibodies or isotype control antibodies. In panel (b), ETBF-colonized Min mice were treated with IL-17A neutralizing antibodies or isotype control antibodies.

## Supplementary Figure 6

**IL-17 blockade does not discernibly modify Stat3 activation by ETBF.**

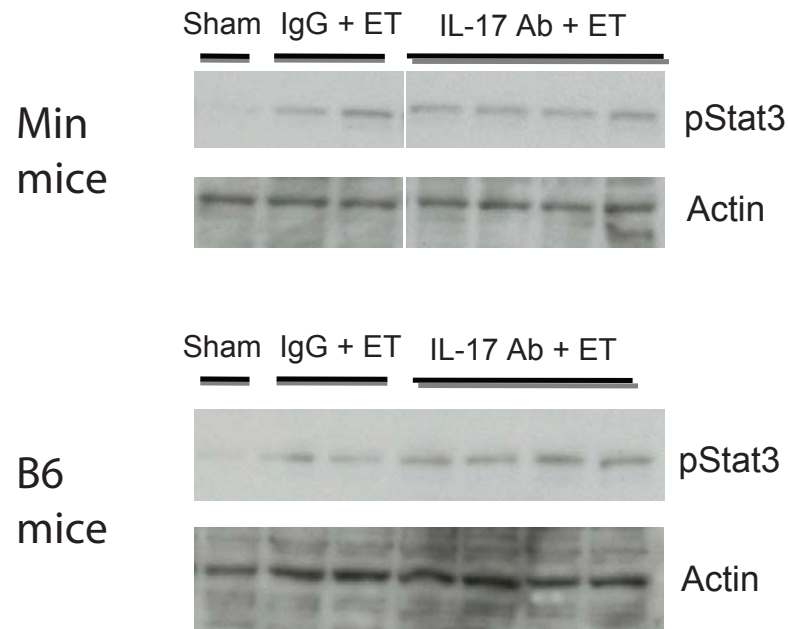

**Figure Legend:** Sham and ETBF-colonized Min or C57Bl/6 mice were treated with IL-17 blocking antibody (IL-17 Ab + ET) or isotype control IgG antibody (IgG + ET) for 3 d followed by extraction of mucosal nuclear proteins and western blot for activated Stat3 (pStat3). Actin serves as a loading control.

### Supplementary Table 1

Mouse colon histology scores 1 wk after NTBF or ETBF colonization in wild-type (WT) or CD4 Stat3-KO C57Bl/6 mice.

|                                    | Median (range)         |                        |
|------------------------------------|------------------------|------------------------|
|                                    | Inflammation           | Hyperplasia            |
| Sham WT ( <i>n</i> = 3)            | 0 (0–0)                | 0 (0–0)                |
| Sham CD4 Stat3-KO ( <i>n</i> = 4)  | 0 (0–1)                | 0.5 (0–1)              |
| NTBF WT ( <i>n</i> = 4)            | 0 (0–0)                | 0.5 (0–1)              |
| NTBF CD4 Stat3-KO ( <i>n</i> = 4)  | 0 (0–1)                | 0.5 (0–1)              |
| ETBF WT ( <i>n</i> = 13)           | 3 (1–4) <sup>a,b</sup> | 2 (2–3) <sup>a,d</sup> |
| ETBF CD4 Stat3-KO ( <i>n</i> = 18) | 2 (1–3) <sup>c</sup>   | 2 (1–3) <sup>e</sup>   |

<sup>a</sup>  $P \leq 0.004$  vs sham and NTBF WT, independently

<sup>b</sup>  $P \leq 0.001$  vs ETBF CD4 Stat3-KO

<sup>c</sup>  $P \leq 0.005$  vs sham and NTBF CD4 Stat3-KO, independently

<sup>d</sup>  $P \leq 0.03$  vs ETBF CD4 Stat3-KO

<sup>e</sup>  $P \leq 0.009$  vs sham and NTBF CD4 Stat3-KO, independently

## Supplementary Table 2

Min mouse colon histology scores 4–5 wks after ETBF colonization  
in mice treated with isotype antibodies or IL-17 and IL-23R neutralizing  
antibodies or IL-17 neutralizing antibodies alone

|                                          | Median (range)       |                      |                        |                         |
|------------------------------------------|----------------------|----------------------|------------------------|-------------------------|
|                                          | Inflammation         | Hyperplasia          | GIN                    | Gross Tumors            |
| ETBF (isotype Abs) ( <i>n</i> = 24)      | 2 (1–3)              | 2 (2–3)              | 2 (0–6)                | 10 (2–32)               |
| ETBF (IL-17/IL-23R Abs) ( <i>n</i> = 14) | 1 (0–1) <sup>a</sup> | 2 (1–2) <sup>b</sup> | 0 (0–1) <sup>b</sup>   | 5 (1–9) <sup>c</sup>    |
| ETBF (IL-17 Abs) ( <i>n</i> = 8)         | 1 (1–1) <sup>d</sup> | 1 (0–2) <sup>b</sup> | 0.5 (0–2) <sup>e</sup> | 3.5 (1–13) <sup>e</sup> |

All comparisons are to ETBF (isotype antibodies).

<sup>a</sup> *P* < 0.004

<sup>b</sup> *P* < 0.0007

<sup>c</sup> *P* < 0.002

<sup>d</sup> *P* = 0.043

<sup>e</sup> *P* < 0.02
